# Supplementary material
Source: publisher figshare collection journal article supplement (https://sage.figshare.com/ndownloader/files/22826879)
Supplement: Supplementary file 1 [file 22826879]

Archive with 7 entries (6 files):
- aux.R
- __MACOSX/
- __MACOSX/._aux.R
- readme.pdf
- __MACOSX/._readme.pdf
- sim.R
- __MACOSX/._sim.R
