# Supplementary material
Source: publisher figshare collection journal article supplement (https://sage.figshare.com/ndownloader/files/22826879)
Supplement: Supplementary file 1 [file 22826879 › readme.pdf]

## Supplementary Materials for:

### ***“Average Power: A Cautionary Note”***

In addition to this document, these supplementary materials contain two scripts, *aux.R* and *sim.R*.

The script *aux.R* contains functions required by the script *sim.R*. These functions compute model likelihoods, estimate models by maximizing the likelihood, calculate average power, and calculate sample size.

The script *sim.R* generates draws from the sampling distribution of average power for the 810 cases of Scenario 1 and Scenario 2 discussed in the manuscript. For each draw, the script records point, standard error, and interval estimates of the effect size (*d.hat*, *d.se*, *d.ci.lb*, *d.ci.ub*) and point and interval estimates of average power (*ap.hat*, *ap.ci.lb*, *ap.ci.ub*). The latter are the quantities of interest.
